# Supplementary material
Source: PubMed Central journal article supplement (PMC3894711)
Supplement: Supp_Fig1.pdf [file Supp_Fig1.pdf]

## Supplementary Data

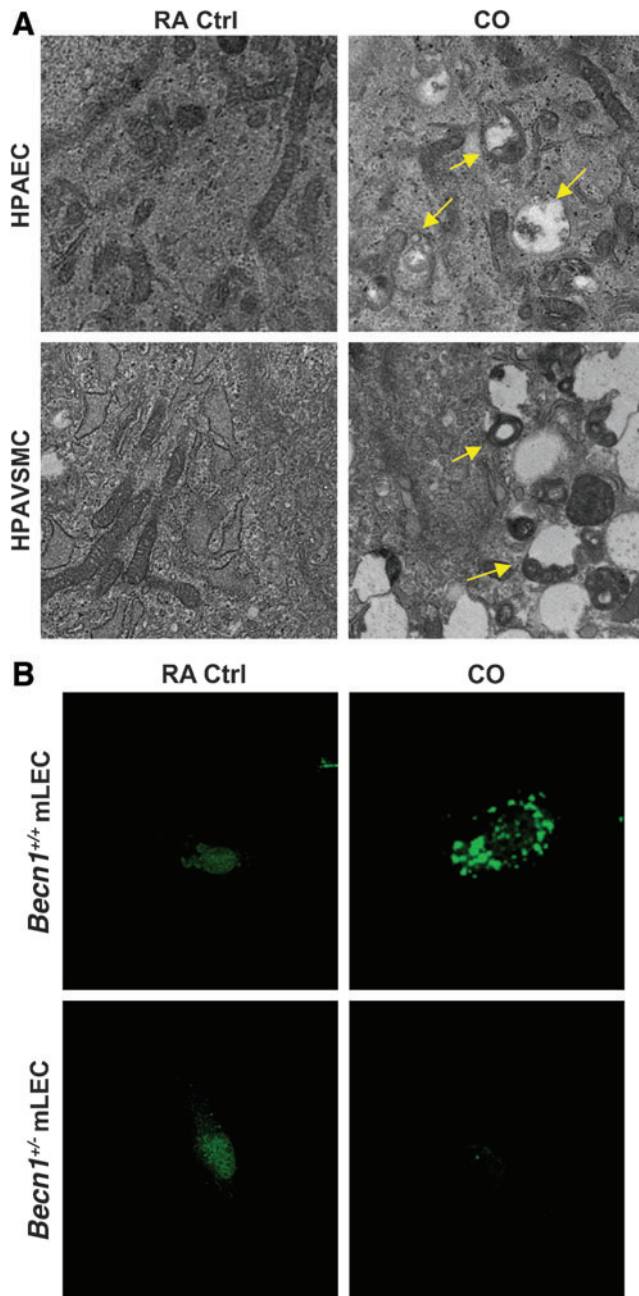

**SUPPLEMENTARY FIG. S1. Autophagy induced by CO is impaired in *Becn1*-deficient vascular system.** The number of autophagosomes was increased in HPAEC and HPAVSMC exposed to CO by transmission electron microscopy (A). Representative micrograph depicts immature (AVi) and degradative (AVd) autophagic vacuoles. The effect of CO on the autophagic function was validated by GFP-LC3B puncta formation (B). HPAEC, human pulmonary artery endothelial cell; HPAVSMC, human pulmonary artery vascular smooth muscle cell; CO, carbon monoxide.
