# Supplementary material
Source: PubMed Central journal article supplement (PMC3894711)
Supplement: Supp_Fig2.pdf [file Supp_Fig2.pdf]

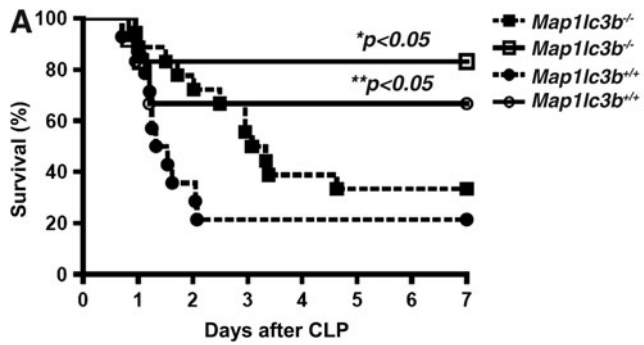

**SUPPLEMENTARY FIG. S2.** CO does not rescue the mortality of LC3B-deficient mice after CLP-induced polymicrobial sepsis. CO was administered for 24 h before or after CLP surgery. Rates of survival were determined for *Map1lc3b*<sup>-/-</sup> and *Map1lc3b*<sup>+/+</sup> mice after CLP. CLP was performed with a 29-G needle and two holes. (Solid square, *Map1lc3b*<sup>-/-</sup> in room air, *n* = 18; solid circle, *Map1lc3b*<sup>+/+</sup> in room air, *n* = 14; open square, *Map1lc3b*<sup>-/-</sup> treated with CO, *n* = 12; blank circle, *Map1lc3b*<sup>+/+</sup> treated with CO) *n* = 6. \**p* < 0.05 (*Map1lc3b*<sup>-/-</sup> CO vs *Map1lc3b*<sup>-/-</sup> RA), \*\**p* < 0.05, (*Map1lc3b*<sup>+/+</sup> CO vs *Map1lc3b*<sup>+/+</sup>) log-rank test.
